# Supplementary material for: Prevalence, molecular epidemiology, and antimicrobial resistance of methicillin-resistant Staphylococcus aureus from swine in southern Italy
Source: PubMed Central journal article supplement (PMC6390553; doi:10.1186/s12866-019-1422-x), 2019-02-26
Supplement: 12866_2019_1422_MOESM2_ESM.pdf [file 12866_2019_1422_MOESM2_ESM.pdf]

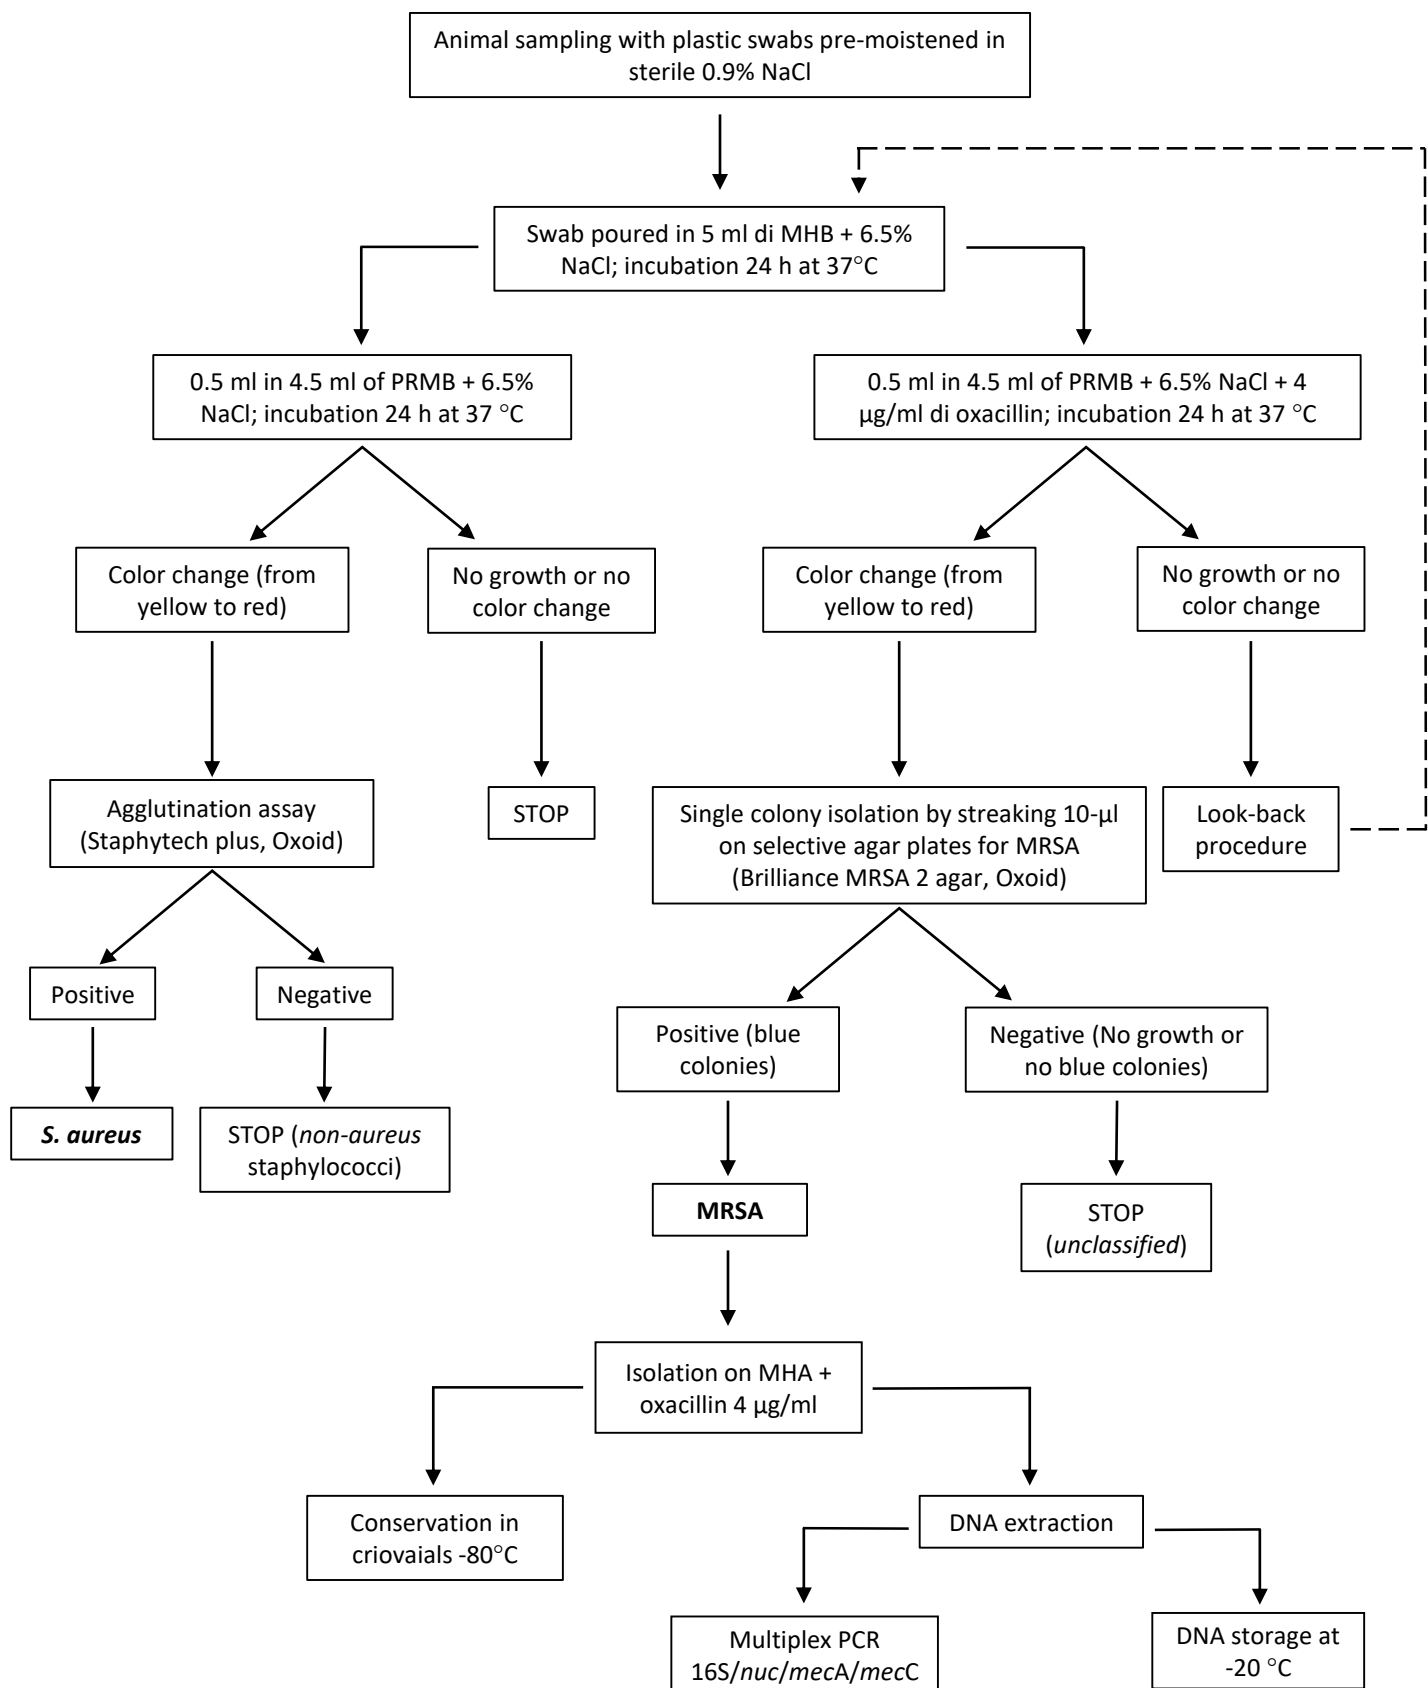

Figure S2. Flow-chart of *S. aureus* and MRSA screening procedure. Abbreviations: MHB, Mueller-Hinton Broth; MHA, Mueller-Hinton Agar; PRMB, Phenol Red Mannitol Broth.
