# Supplementary material for: Prevalence, molecular epidemiology, and antimicrobial resistance of methicillin-resistant Staphylococcus aureus from swine in southern Italy
Source: PubMed Central journal article supplement (PMC6390553; doi:10.1186/s12866-019-1422-x), 2019-02-26
Supplement: 12866_2019_1422_MOESM3_ESM.pdf [file 12866_2019_1422_MOESM3_ESM.pdf]

**Table S1. Distribution of SCCmec types according to the *spa* type**

| <i>spa</i> types | Repeat succession             | No. of isolates (%) | SCCmec type (no., %)           |
|------------------|-------------------------------|---------------------|--------------------------------|
| t011             | 08-16-02-25-34-24-25          | 81 (37.0)           | V (81, 100%)                   |
| t034             | 08-16-02-25-02-25-34-24-25    | 49 (22.4)           | V (49, 100%)                   |
| t899             | 07-16-23-02-34                | 33 (15.1)           | IVc (11, 33.3%), V (22, 66.7%) |
| t571             | 08-16-02-25-02-25-34-25       | 17 (7.8)            | V (17, 100%)                   |
| t1606            | 08-16-34-34-24-25             | 13 (5.9)            | V (13, 100%)                   |
| t4474            | 26-16-23-02-34                | 12 (5.5)            | V (12, 100%)                   |
| t10485           | 35-25-02-25-34-24-25          | 4 (1.8)             | V (4, 100%)                    |
| t108             | 08-16-02-25-24-25             | 3 (1.4)             | V (3, 100%)                    |
| t1184            | 08-16-02-25-25                | 2 (0.9)             | V (2, 100%)                    |
| t1793            | 08-16-02-25-02-25-34-24-24-25 | 2 (0.9)             | V (2, 100%)                    |
| t18290           | 08-16-783-25-34-24-25         | 1 (0.5)             | V (1, 100%)                    |
| t2876            | 08-16-02-25-02-25-24-25       | 1 (0.5)             | V (1, 100%)                    |
| t5524            | 08-16-34-34-25                | 1 (0.5)             | V (1, 100%)                    |
| Total            |                               | 219 (100)           | IVc (11, 5.0%), V (208, 95.0%) |
