# Supplementary material for: Prevalence, molecular epidemiology, and antimicrobial resistance of methicillin-resistant Staphylococcus aureus from swine in southern Italy
Source: PubMed Central journal article supplement (PMC6390553; doi:10.1186/s12866-019-1422-x), 2019-02-26
Supplement: 12866_2019_1422_MOESM4_ESM.pdf [file 12866_2019_1422_MOESM4_ESM.pdf]

tgaccgtaatccttgtaaatattttaaaggctaaatctctaatcattttatctttgttcagcatcatttaa  
ttttctaaaaaacgcacta**tattttct***GATAAAGTCCGTATAATTGTGTAAAAGTAAAAAGGCCATA*  
*TAAACAGTCCTTTTACGGTACAATGTTTTTAACGACAAAAACATACCCAGGAGGACTTTTACATGACCC*  
*AAGTACATTTTACACTGAAAAGCGAAGAGATTCAAAGCATTATTGAATATTCTGTAAAGGATGACGTT*  
*TCTAAAAATATTTTAACAACGGTATTTAATCAACTAATGGAAAATCAACGAACAGAATATATTTCAAGC*  
*AAAAGAATATGAACGAACAGAAAACCGACAAAGTCAACGAAATGGCTATTATGAGCGCAGCTTTACGA*  
*CACGTGTAGGCACGCTAGAATTAAAAGTACCCAGAACACGTGATGGCCATTTTTTCACCCACAGTGTTT*  
*GAACGTTATCAACGAAACGAAAAAGCCCTCATGGCTTCAATGTTGGAAATGTATGTATCAGGCGTTTTC*  
*AACTCGTAAAGTATCAAAAATTGTGGAAGAACTTTGTGGTAAATCCGTCTCTAAGTCCTTCGTTTTCTA*  
*GCTTAACGAACAGCTAGAAACCTATGGTTAACGAGTGGCAGAATCGTTTATTATCAGAAAAAATTT*  
*ATTCCTTACTTAATGACCGATGTACTCTATATAAAAGTACGAGAAGAAAATCGAGTACTCTCAAAAAG*  
*CTGTCATATAGCGATTGGAATAACCAAAGATGGCGACCGTGAAATTATCGGCTTCATGATTCAAAGTG*  
*GCGAAAGCGAAGAGACCTGGACAACATTTTTTTGAATACCTAAAAGAACGCGGTTTACAAGGTACGGA*  
*ACTCGTTATTTCTGATGCGCACAAAGGATTAGTCTCTGCCATTAGAAAATCCTTCACCAACGTAAGGT*  
*TGGCAAAGATGCCAAGTTCACTTCCTAAGAAAATATCTTTACCACCATTCTTAAAAAAAATTCAAAATC*  
*TTTCAGAGAAGCTGTTAAAGGAATTTTTTAAGTTCACAGATATTAAGTTCAGCGCGTGAGGCTAAAAATC*  
*GATTGATTCATGATTATATCGATCAACCAAAAATTTCAAAGCTTGCGCATCATTGGATGATGGATTTC*  
*GAAGACGCCTTTCAATATACCGTACAAGGAAATCCCACAATCGACTAAAGAGTACCAATCTAATTGA*  
*ACGACTGAATCAAGAAGTACGCAGAAGAGAAAAGATTATTCGCATCTTCCCCAATCAAACATCAGCCA*  
*ATCGCTTAATTGGAGCCGTTCTTATGGACCTACATGATGAATGGATTTATTCTTCAAGAAAATACATC*  
*AATTTTGATAA*GTAGAAATGGTAAAAACATTGTATAGCA*TTTACACAGGAGTCTGGACTTGACT***tat**  
**tttct**gtatcaaatttttttaattccgtagaattttctagttttcttctgtgggtaatatctttctta  
tgataagctttcatataaatattttaagtattctgggatc

Figure S3. Sequence of the 1,535-nt DNA amplicon containing the IS256 insertion in the A07 fragment of the SAPIG2195 coding region (lower case). A07r and A07f (reverse-complementary) primer sequences are underlined. The two octanucleotide direct repeats flanking IS256 are in bold, and the two imperfect inverted repeats flanking the transposase gene are italicized. The coding region of the transposase gene is highlighted in gray.
