# Supplementary material for: Prevalence, molecular epidemiology, and antimicrobial resistance of methicillin-resistant Staphylococcus aureus from swine in southern Italy
Source: PubMed Central journal article supplement (PMC6390553; doi:10.1186/s12866-019-1422-x), 2019-02-26
Supplement: 12866_2019_1422_MOESM5_ESM.pdf [file 12866_2019_1422_MOESM5_ESM.pdf]

**Table S2. Antimicrobial resistance profile and epidemiological type of 219 MRSA isolates**

| Antimicrobial resistance profile                | N° of isolates (%) | Epidemiological type ( <i>spa</i> and <i>SCCmec</i> type) (no. of isolates)               |
|-------------------------------------------------|--------------------|-------------------------------------------------------------------------------------------|
| PEN,AMS,OXA,ENR,MAR,ERY,CLI,TET,SXT             | 22 (10.0)          | t011-V (4/81), t034-V (11/49), t571-V (1/17), t10485-V (2/4), t108-V (2/3), t1793-V (2/2) |
| PEN,AMS,OXA,CLI,TET                             | 18 (8.2)           | t011-V (18/81)                                                                            |
| PEN,OXA,CLI,TET,SXT                             | 15 (6.8)           | t899-V (10/22), t571-V (1/17), t4474-V (4/12)                                             |
| PEN,OXA,ENR,MAR,CLI,TET,SXT                     | 13 (5.9)           | t034-V (9/49), t4474-V (4/12)                                                             |
| PEN,OXA,ENR,MAR,ERY,CLI,TET,SXT                 | 8 (3.7)            | t034-V (7/49), t571-V (1/17)                                                              |
| PEN,AMS,OXA,ENR,MAR,CLI,TET,SXT                 | 7 (3.2)            | t034-V (5), t571-V (2/17)                                                                 |
| PEN,AMS,OXA,ERY,CLI,TET,SXT                     | 7 (3.2)            | t011-V (3/81), t034-V (2/49), t10485-V (1/4), t2876-V (1/1)                               |
| PEN,AMS,OXA,CLI,TET,SXT                         | 7 (3.2)            | t034-V (2/49), t571-V (5/17)                                                              |
| PEN,AMS,OXA,ENR,CLI,TET                         | 6 (2.7)            | t011-V (6/81)                                                                             |
| PEN,AMS,OXA,ENR,CLI,TET,SXT                     | 5 (2.3)            | t034-V (3/49), t571-V (2/17)                                                              |
| PEN,AMS,OXA,ENR,MAR,ERY,CLI,TET                 | 5 (2.3)            | t011-V (5/81)                                                                             |
| PEN,AMS,OXA,ENR,ERY,CLI,TET,SXT                 | 5 (2.3)            | t011-V (1/81), t034-V (3/49), t10485-V (1/4)                                              |
| PEN,OXA,ENR,CLI,TET,SXT                         | 5 (2.3)            | t899-V (1/22), t571-V (1/17), t4474-V (3/12)                                              |
| PEN,OXA,GEN,KAN,ENR,MAR,CLI,TET                 | 5 (2.3)            | t899-V (5/22)                                                                             |
| PEN,OXA,GEN,KAN,ENR,ERY,CLI,TET,SXT             | 4 (1.8)            | t1606-V (4/13)                                                                            |
| PEN,OXA,CLI,TET                                 | 4 (1.8)            | t011-V (4/81)                                                                             |
| PEN,AMS,OXA,ENR,MAR,CLI,TET,NIT,SXT             | 4 (1.8)            | t571-V (4/17)                                                                             |
| PEN,AMS,OXA,GEN,KAN,ENR,MAR,ERY,TET,SXT         | 3 (1.4)            | t011-V (3/81)                                                                             |
| PEN,AMS,OXA,IMP,GEN,KAN,ENR,MAR,ERY,CLI,TET     | 3 (1.4)            | t011-V (3/81)                                                                             |
| PEN,OXA,GEN,KAN,ENR,MAR,ERY,CLI,TET,SXT         | 3 (1.4)            | t1606-V (3/13)                                                                            |
| PEN,AMS,OXA,KAN,ENR,ERY,CLI,TET,SXT             | 3 (1.4)            | t011-V (1/81), t1184-V (2/2)                                                              |
| PEN,AMS,OXA,GEN,KAN,ENR,TET,SXT                 | 2 (0.9)            | t011-V (2/81)                                                                             |
| PEN,AMS,OXA,ENR,MAR,ERY,CLI,TET,NIT,SXT         | 2 (0.9)            | t034-V (1/49), t108-V (1/3)                                                               |
| PEN,AMS,OXA,IMP,ENR,MAR,ERY,CLI,TET,SXT         | 2 (0.9)            | t011-V (1/81), t034-V (1/49)                                                              |
| PEN,AMS,OXA,IMP,GEN,KAN,ERY,CLI,TET,SXT         | 2 (0.9)            | t1606-V (1/13), t5524-V (1/1)                                                             |
| PEN,AMS,OXA,GEN,KAN,CLI,TET                     | 2 (0.9)            | t011-V (2/81)                                                                             |
| PEN,AMS,OXA,IMP,ENR,ERY,CLI,TET,SXT             | 2 (0.9)            | t011-V (1/81), t034-V (1/49)                                                              |
| PEN,AMS,OXA,ERY,CLI,TET                         | 2 (0.9)            | t011-V (2/81)                                                                             |
| PEN,OXA,ENR,MAR,CLI,TET,CHL,SXT                 | 2 (0.9)            | t899-IVc (2/11)                                                                           |
| PEN,AMS,OXA,ENR,MAR,ERY,CLI,TET,CHL,SXT         | 2 (0.9)            | t899-IVc (2/11)                                                                           |
| PEN,OXA,CLI,TET,CHL,SXT                         | 2 (0.9)            | t899-IVc (2/11)                                                                           |
| PEN,OXA,GEN,KAN,ENR,MAR,TET                     | 2 (0.9)            | t899-V (2/22)                                                                             |
| PEN,AMS,OXA,GEN,KAN,ENR,MAR,CLI,TET,SXT         | 1 (0.5)            | t011-V (1/81)                                                                             |
| PEN,AMS,OXA,IMP,GEN,KAN,ENR,MAR,TET,SXT         | 1 (0.5)            | t011-V (1/81)                                                                             |
| PEN,AMS,OXA,GEN,KAN,ENR,TET                     | 1 (0.5)            | t011-V (1/81)                                                                             |
| PEN,AMS,OXA,GEN,KAN,TET,SXT                     | 1 (0.5)            | t011-V (1/81)                                                                             |
| PEN,OXA,KAN,ENR,MAR,ERY,CLI,TET,CHL,SXT         | 1 (0.5)            | t899-IVc (1/11)                                                                           |
| PEN,AMS,OXA,IMP,KAN,ENR,MAR,ERY,CLI,TET,CHL,SXT | 1 (0.5)            | t011-V (1/81)                                                                             |
| PEN,AMS,OXA,IMP,ENR,MAR,ERY,CLI,TET,CHL,SXT     | 1 (0.5)            | t011-V (1/81)                                                                             |
| PEN,AMS,OXA,ENR,MAR,TET,CHL                     | 1 (0.5)            | t011-V (1/81)                                                                             |
| PEN,OXA,ENR,MAR,ERY,CLI,TET,CHL                 | 1 (0.5)            | t011-V (1/81)                                                                             |
| PEN,OXA,GEN,KAN,ERY,CLI,TET,SXT                 | 1 (0.5)            | t1606-V (1/13)                                                                            |
| PEN,AMS,OXA,GEN,KAN,ENR,ERY,CLI,TET,SXT         | 1 (0.5)            | t1606-V (1/13)                                                                            |
| PEN,AMS,OXA,IMP,GEN,KAN,CLI,TET                 | 1 (0.5)            | t011-V (1/81)                                                                             |
| PEN,AMS,OXA,GEN,KAN,ENR,MAR,CLI,TET             | 1 (0.5)            | t011-V (1/81)                                                                             |
| PEN,AMS,OXA,GEN,KAN,ENR,MAR,ERY,CLI,TET         | 1 (0.5)            | t011-V (1/81)                                                                             |
| PEN,AMS,OXA,GEN,KAN,ENR,MAR,ERY,CLI,TET,NIT,SXT | 1 (0.5)            | t011-V (1/81)                                                                             |
| PEN,AMS,OXA,IMP,GEN,KAN,ENR,MAR,ERY,CLI,TET,SXT | 1 (0.5)            | t1606-V (1/13)                                                                            |
| PEN,AMS,OXA,GEN,KAN,ERY,CLI,TET                 | 1 (0.5)            | t011-V (1/81)                                                                             |
| PEN,AMS,OXA,IMP,ENR,MAR,ERY,TET,SXT             | 1 (0.5)            | t1606-V (1/13)                                                                            |
| PEN,AMS,OXA,IMP,GEN,KAN,ENR,ERY,CLI,TET,SXT     | 1 (0.5)            | t1606-V (1/13)                                                                            |
| PEN,AMS,OXA,IMP,GEN,KAN,ERY,CLI,TET             | 1 (0.5)            | t18290-V (1/1)                                                                            |
| PEN,AMS,OXA,GEN,ENR,MAR,ERY,CLI,TET             | 1 (0.5)            | t011-V (1/81)                                                                             |
| PEN,AMS,OXA,ENR,MAR,ERY,CLI,TET,RIF,SXT         | 1 (0.5)            | t011-V (1/81)                                                                             |
| PEN,AMS,OXA,IMP,ENR,ERY,CLI,TET                 | 1 (0.5)            | t011-V (1/81)                                                                             |
| PEN,OXA,MAR,CLI,TET                             | 1 (0.5)            | t011-V (1/81)                                                                             |
| PEN,AMS,OXA,MAR,ERY,CLI,TET,CHL,SXT             | 1 (0.5)            | t011-V (1/81)                                                                             |
| PEN,AMS,OXA,IMP,ERY,CLI,TET                     | 1 (0.5)            | t011-V (1/81)                                                                             |
| PEN,AMS,OXA,IMP,CLI,TET                         | 1 (0.5)            | t011-V (1/81)                                                                             |
| PEN,AMS,OXA,IMP,KAN,ENR,MAR,ERY,CLI,TET         | 1 (0.5)            | t034-V (1/49)                                                                             |
| PEN,AMS,OXA,IMP,CLI,TET,SXT                     | 1 (0.5)            | t034-V (1/49)                                                                             |
| PEN,AMS,OXA,KAN,ENR,MAR,ERY,CLI,TET,CHL,SXT     | 1 (0.5)            | t899-IVc (1/11)                                                                           |
| PEN,AMS,OXA,ERY,CLI,TET,CHL,SXT                 | 1 (0.5)            | t899-IVc (1/11)                                                                           |
| PEN,OXA,ERY,CLI,TET,CHL,SXT                     | 1 (0.5)            | t899-IVc (1/11)                                                                           |
| PEN,OXA,ENR,MAR,ERY,CLI,TET,CHL,SXT             | 1 (0.5)            | t899-IVc (1/11)                                                                           |
| PEN,AMS,OXA,ENR,CLI,TET,NIT,SXT                 | 1 (0.5)            | t034-V (1/49)                                                                             |
| PEN,AMS,OXA,CLI,TET,NIT,SXT                     | 1 (0.5)            | t034-V (1/49)                                                                             |
| PEN,AMS,OXA,ENR,CLI,TET,NIT                     | 1 (0.5)            | t011-V (1/81)                                                                             |
| PEN,AMS,OXA,GEN,CLI,TET                         | 1 (0.5)            | t011-V (1/81)                                                                             |
| PEN,AMS,OXA,GEN,ERY,CLI,TET,SXT                 | 1 (0.5)            | t011-V (1/81)                                                                             |
| PEN,OXA,ENR,ERY,CLI,TET                         | 1 (0.5)            | t899-V (1/22)                                                                             |
| PEN,OXA,TET                                     | 1 (0.5)            | t899-V (1/22)                                                                             |
| PEN,OXA,ENR,MAR,ERY,CLI,TET                     | 1 (0.5)            | t899-V (1/22)                                                                             |
| PEN,OXA,ENR,TET                                 | 1 (0.5)            | t899-V (1/22)                                                                             |
| PEN,OXA,MAR,CLI,TET,SXT                         | 1 (0.5)            | t4474-V (1/12)                                                                            |
| PEN,AMS,OXA,ENR,MAR,CLI,TET                     | 1 (0.5)            | t011-V (1/81)                                                                             |
| PEN,AMS,OXA,ENR,MAR,TET                         | 1 (0.5)            | t011-V (1/81)                                                                             |
