# Supplementary material for: Prevalence, molecular epidemiology, and antimicrobial resistance of methicillin-resistant Staphylococcus aureus from swine in southern Italy
Source: PubMed Central journal article supplement (PMC6390553; doi:10.1186/s12866-019-1422-x), 2019-02-26
Supplement: 12866_2019_1422_MOESM6_ESM.pdf [file 12866_2019_1422_MOESM6_ESM.pdf]

**Table S3. Diversity of antimicrobial susceptibility patterns among MRSA epidemiological types**

| Epidemiological type ( <i>spa</i> and <i>SCCmec</i> type) | No. of isolates | No. of antibiotypes | Antibiotype diversity <sup>a</sup> |
|-----------------------------------------------------------|-----------------|---------------------|------------------------------------|
| t011-V                                                    | 81              | 40                  | 0.51                               |
| t034-V                                                    | 49              | 15                  | 0.69                               |
| t899-V                                                    | 22              | 8                   | 0.64                               |
| t899-IVc                                                  | 11              | 8                   | 0.27                               |
| t571-V                                                    | 17              | 8                   | 0.53                               |
| t1606-V                                                   | 13              | 8                   | 0.38                               |
| t4474-V                                                   | 12              | 4                   | 0.67                               |
| t10485-V                                                  | 4               | 3                   | 0.25                               |
| t108-V                                                    | 3               | 2                   | 0.33                               |
| t1184-V                                                   | 2               | 1                   | 0.50                               |
| t1793-V                                                   | 2               | 1                   | 0.50                               |
| t18290-V                                                  | 1               | 1                   | 0                                  |
| t2876-V                                                   | 1               | 1                   | 0                                  |
| t5524-V                                                   | 1               | 1                   | 0                                  |
| Total                                                     | 219             | 101                 | 0.54                               |

<sup>a</sup> Expressed as  $1 - (\text{No. of antibiotypes} / \text{No. of isolates})$
